# Supplementary material for: Inclusion of Camelina sativa Seeds in Ewes’ Diet Modifies Rumen Microbiota
Source: MDPI journal article supplement (doi:10.3390/ani13030377), 2023-01-22
Supplement: s1 [file s1]

**Table S1.** Concentrate ingredients of the four dietary treatments (CON, CS6, CS11, CS16) with different levels of *Camelina sativa* seeds (0, 60, 110, and 160 g·kg<sup>-1</sup> of concentrate).

| Ingredients (g/kg)           | Concentrates |     |      |      |
|------------------------------|--------------|-----|------|------|
|                              | CON          | CS6 | CS11 | CS16 |
| <i>Camelina sativa</i> seeds | 0            | 60  | 110  | 160  |
| Maize grain                  | 344          | 299 | 269  | 239  |
| Barley                       | 200          | 200 | 200  | 200  |
| Wheat middlings              | 100          | 100 | 100  | 100  |
| Sunflower meal               | 160          | 180 | 180  | 180  |
| Soybean meal                 | 155          | 120 | 100  | 80   |
| Premix mineral and vitamins  | 41           | 41  | 41   | 41   |

CON: dietary treatment with 0 g *Camelina sativa* seeds·kg<sup>-1</sup> of concentrate; CS6: dietary treatment with 60 g *Camelina sativa* seeds·kg<sup>-1</sup> of concentrate; CS11: dietary treatment with 110 g *Camelina sativa* seeds·kg<sup>-1</sup> of concentrate; CS16: dietary treatment with 160 g *Camelina sativa* seeds·kg<sup>-1</sup> of concentrate.

**Table S2.** Sequences of primers used for RT-PCRs, genomic regions of PCR amplification, primer efficiency, amplicon size, and hybridization temperature.

| Target Species                      | Genomic Region of PCR Amplification | Primer Sequencing                                                          | Primer Efficiency % | Slope  | Amplicon bp | T <sub>m</sub> °C |
|-------------------------------------|-------------------------------------|----------------------------------------------------------------------------|---------------------|--------|-------------|-------------------|
| Total bacteria                      | 16s rRNA                            | F: 5'-CGGCAACGAGCGCAACCC-3'<br>R: 5'-CCATTGTAGCACGTGTGTAGCC-3'             | 98                  | -3.378 | 130         | 60                |
| Bacteroidetes                       | 16s rRNA                            | F: 5'-GGARCATGTGGTTTAATTTCGATGAT-3'<br>R: 5'-AGCTGACGACAACCATGCAG-3'       | 98                  | -3.36  | 126         | 62                |
| Firmicutes                          | 16s rRNA                            | F: 5'-GGAGYATGTGGTTTAATTTCGAAGCA-3'<br>R: 5'-AGCTGACGACAACCATGCAC-3'       | 97                  | -3.39  | 126         | 62                |
| Archaea                             | 16s rRNA                            | F: 5'-GAGGAAGGAGTGGACGACGGTA-3'<br>R: 5'-ACGGGCGGTGTGTGCAAG-3'             | 96                  | -3.43  | 233         | 60                |
| Protozoa                            | 18s rRNA                            | F: 5'-GCTTTTCGWTGGTAGTGTATT-3'<br>R: 5'-CTTGCCCTCYAATCGTWCT-3'             | 97                  | -3.39  | 223         | 55                |
| <i>Entodinium</i>                   | 18s rRNA                            | F: 5'-GAGCTAATACATGCTAAGGC-3'<br>R: 5'-CCCTCACTACAATCGAGATTTAAGG-3'        | 97                  | -3.39  | 317         | 59                |
| Total fungi                         | 18s rRNA ITS1                       | F: 5'-GAGGAAGTAAAGTCGTAACAAGGTTTC-3'<br>R: 5'-CAAATTCACAAAGGGTAGGATGATT-3' | 98                  | -3.38  | 120         | 58                |
| Neocallimastigales                  | 18s rRNA ITS1                       | F: 5'-TTGACAATGGATCTCTTGTTCTC-3'<br>R: 5'-GTGCAATATGCGTTCGAAGATT-3'        | 96                  | -3.43  | 110         | 63                |
| Methanogen                          | mcrA                                | F: 5'-TTCGGTGGATCDCARAGRGC-3'<br>R: 5'-GBARGTCGWAWCCGTAGAATCC-3'           | 95                  | -3.44  | 140         | 58                |
| Methanomassiliicoccales             | 16s rRNA                            | F: 5'-TTCTGGGGTAGGGGTAAATC-3'<br>R: 5'-GTCTGCAGCGTTTACACCCT-3'             | 97                  | -3.40  | 149         | 62                |
| <i>Methanobrevibacter</i> spp.      | 16s rRNA                            | F: 5'-TGGGAATTGCTGGWGATACTRTT-3'<br>R: 5'-GGAGCRGCTCAAAGCCA-3'             | 95                  | -3.46  | 231         | 60                |
| <i>Methanospaera stadtmannae</i>    | 16s rRNA                            | F: 5'-CTTAACATAAGAATTGCTGGAG-3'<br>R: 5'-TTCGTTACTACCGTCAAGATC-3'          | 97                  | -3.39  | 150         | 58                |
| <i>Butyrivibrio fibrisolvens</i>    | 16s rRNA                            | F: 5'-TAACATGAGAGTTTGATCCTGGCTC-3'<br>R: 5'-CGTTACTACCCGTCCGC-3'           | 97                  | -3.39  | 136         | 58                |
| <i>Butyrivibrio proteoclasticus</i> | 16s rRNA                            | F: 5'-TCCGGTGGTATGAGATGGGC-3'<br>R: 5'-GTCGCTGCATCAGAGTTTCT-3'             | 98                  | -3.38  | 185         | 60                |
| <i>Eubacterium ruminantium</i>      | 16s rRNA                            | F: 5'-CTCCGAGACTGAGGAAGCTTG-3'<br>R: 5'-GTCCATCTCACACCACCGGA-3'            | 98                  | -3.36  | 184         | 62                |

|                                  |          |                                         |    |       |     |    |
|----------------------------------|----------|-----------------------------------------|----|-------|-----|----|
| <i>Ruminococcus flavefaciens</i> | 16s rRNA | F: 5'-CGAACGGAGATAAATTTGAGTTTACTTAGG-3' | 95 | −3.42 | 132 | 60 |
|                                  |          | R: 5'-CGGTCTCTGTATGTTATGAGGTATTACC-3'   |    |       |     |    |
| <i>Fibrobacter succinogenes</i>  | 16s rRNA | F: 5'-GCGGGATTGAATGTACCTTGAGA-3'        | 98 | −3.39 | 204 | 60 |
|                                  |          | R: 5'-TCCGCCTGCCCTGAACATC-3'            |    |       |     |    |
| <i>Ruminococcus albus</i>        | 16s rRNA | F: 5'-CCCTAAAAGCAGTCTTAGTTTCG-3'        | 98 | −3.38 | 175 | 62 |
|                                  |          | R: 5'-CCTCCTTGCGGTAGAAC-3'              |    |       |     |    |
| <i>Ruminobacter amylophilus</i>  | 16s rRNA | F: 5'-ATGCAAGTCGAACGGTAACAGCAGG-3'      | 96 | −3.42 | 115 | 65 |
|                                  |          | R: 5'-GCACCCGTTTCCAGGTGTTGTCC-3'        |    |       |     |    |
| <i>Streptococcus bovis</i>       | 16s rRNA | F: 5'-TTCCTAGAGATAGGAAGTTTCTTCGG-3'     | 96 | −3.43 | 127 | 57 |
|                                  |          | R: 5'-ATGATGGCACTAACAATAGGGGT-3'        |    |       |     |    |
| <i>Selenomonas ruminantium</i>   | 16s rRNA | F: 5'-CAATAAGCATTCCGCCTGGG-3'           | 99 | −3.35 | 138 | 57 |
|                                  |          | R: 5'-TTCACCTCAATGTCAAGCCCTGG-3'        |    |       |     |    |
| <i>Prevotella sp.</i>            | 16s rRNA | F: 5'-GGTTCTGAGAGGAAGGTCCCC-3'          | 96 | −3.42 | 121 | 60 |
|                                  |          | R: 5'-TCCTGCACGCTACTTGGCTG-3'           |    |       |     |    |
| <i>Prevotella brevis</i>         | 16s rRNA | F: 5'-GGTTTCCTTGAGTGTATTCGACGTC-3'      | 98 | −3.38 | 219 | 64 |
|                                  |          | R: 5'-CTTTCGCTTGGCCGCTG-3'              |    |       |     |    |
| <i>Prevotella ruminicola</i>     | 16s rRNA | F: 5'-GAAAGTCGGATTAATGCTCTATGTTG-3'     | 97 | −3.39 | 74  | 63 |
|                                  |          | R: 5'-CATCCTATAGCGGTAAACCTTTGG-3'       |    |       |     |    |

**Table S3.** Relative abundance of the microorganisms in ewes' rumen fluid of the four dietary treatments (CON, CS6, CS11, CS16) with different levels of *Camelina sativa* seeds (0, 60, 110, and 160 g·kg<sup>−1</sup> of concentrate).

|                                     | Dietary treatments  |                     |                     |                    | SEM <sup>a</sup> | <i>p</i> |
|-------------------------------------|---------------------|---------------------|---------------------|--------------------|------------------|----------|
|                                     | CON                 | CS6                 | CS11                | CS16               |                  |          |
| Bacteroidetes                       | 0.421               | 0.388               | 0.396               | 0.449              | 0.012            | 0.307    |
| Firmicutes                          | 0.351               | 0.413               | 0.412               | 0.370              | 0.022            | 0.737    |
| Firmicutes:Bacteroidetes            | 0.844               | 1.055               | 1.047               | 0.806              | 0.048            | 0.137    |
| <i>Prevotella sp.</i>               | 0.257               | 0.263               | 0.260               | 0.269              | 0.007            | 0.952    |
| <i>Prevotella ruminicola</i>        | 0.160               | 0.136               | 0.166               | 0.122              | 0.007            | 0.116    |
| <i>Prevotella brevis</i>            | 0.007               | 0.007               | 0.006               | 0.005              | 0.002            | 0.867    |
| Protozoa                            | 0.031 <sup>b</sup>  | 0.080 <sup>a</sup>  | 0.027 <sup>b</sup>  | 0.044 <sup>b</sup> | 0.005            | <0.001   |
| Total Fungi                         | 0.0006              | 0.0010              | 0.0006              | 0.0005             | 0.00008          | 0.159    |
| <i>Neocallimastigales</i>           | 0.0005 <sup>t</sup> | 0.0009 <sup>t</sup> | 0.0005 <sup>t</sup> | 0.0006             | 0.00007          | 0.051    |
| <i>Entodinium</i>                   | 0.010 <sup>b</sup>  | 0.025 <sup>a</sup>  | 0.006 <sup>b</sup>  | 0.013 <sup>b</sup> | 0.002            | <0.001   |
| Archaea                             | 0.009               | 0.015 <sup>t</sup>  | 0.008 <sup>t</sup>  | 0.012              | 0.001            | 0.070    |
| Total Methanogen                    | 0.0010              | 0.0010              | 0.0006              | 0.0008             | 0.0001           | 0.262    |
| <i>Methanomassiliicoccales</i>      | 0.009               | 0.009               | 0.007               | 0.008              | 0.0007           | 0.478    |
| <i>Methanobrevibacter</i>           | <0.0001             | 0.0001              | 0.0001              | <0.0001            | 0.00001          | 0.402    |
| <i>Methanosphaera stadtmanae</i>    | <0.0001             | <0.0001             | <0.0001             | <0.0001            | 0.00000          | 0.469    |
| <i>Ruminococcus flavefaciens</i>    | 0.0004              | 0.0004              | 0.0002              | 0.0003             | 0.00005          | 0.553    |
| <i>Ruminobacter amylophilus</i>     | 0.006 <sup>b</sup>  | 0.002 <sup>b</sup>  | 0.014 <sup>a</sup>  | 0.004 <sup>b</sup> | 0.0014           | 0.002    |
| <i>Ruminococcus albus</i>           | 0.010               | 0.011               | 0.011               | 0.008              | 0.0009           | 0.518    |
| <i>Butyrivibrio fibrisolvens</i>    | 0.090               | 0.094               | 0.102               | 0.092              | 0.005            | 0.794    |
| <i>Butyrivibrio proteoclasticus</i> | 0.021               | 0.019               | 0.028               | 0.020              | 0.002            | 0.342    |
| <i>Fibrobacter succinogenes</i>     | 0.007 <sup>b</sup>  | 0.027 <sup>a</sup>  | 0.004 <sup>b</sup>  | 0.009 <sup>b</sup> | 0.002            | <0.001   |
| <i>Selenomonas ruminantium</i>      | 0.020               | 0.016               | 0.017               | 0.015              | 0.001            | 0.703    |
| <i>Streptococcus bovis</i>          | 0.0006              | 0.0003 <sup>t</sup> | 0.0007 <sup>t</sup> | 0.0005             | 0.00006          | 0.084    |
| <i>Eubacterium ruminantium</i>      | 0.001               | 0.002               | 0.002               | 0.002              | 0.0003           | 0.548    |

CON: dietary treatment with 0 g *Camelina sativa* seeds·kg<sup>−1</sup> of concentrate; CS6: dietary treatment with 60 g *Camelina sativa* seeds·kg<sup>−1</sup> of concentrate; CS11: dietary treatment with 110 g *Camelina sativa* seeds·kg<sup>−1</sup> of concentrate; CS16: dietary treatment with 160 g *Camelina sativa* seeds·kg<sup>−1</sup> of

concentrate; Different superscript letters (a. b) between dietary treatments differ significantly ( $p < 0.05$ ) and t is referred to values between 0.05 and 0.100 ( $0.05 < t < 0.10$ ); <sup>a</sup>SEM = standard error mean;  $p = p$  value.

**Table S4.** Relative abundance of the microorganisms in ewes' rumen solid of the four dietary treatments (CON, CS6, CS11, CS16) with different levels of *Camelina sativa* seeds (0, 60, 110, and 160 g·kg<sup>-1</sup> of concentrate).

|                                     | Dietary treatments  |                      |                      |                     | SEM <sup>a</sup> | <i>p</i> |
|-------------------------------------|---------------------|----------------------|----------------------|---------------------|------------------|----------|
|                                     | CON                 | CS6                  | CS11                 | CS16                |                  |          |
| Bacteroidetes                       | 0.391               | 0.390                | 0.431                | 0.439               | 0.014            | 0.504    |
| Firmicutes                          | 0.373               | 0.422                | 0.379                | 0.375               | 0.016            | 0.727    |
| Firmicutes:Bacteroidetes            | 0.962               | 1.112                | 0.892                | 0.866               | 0.040            | 0.143    |
| <i>Prevotella</i> spp.              | 0.231               | 0.236                | 0.289                | 0.303               | 0.013            | 0.120    |
| <i>Prevotella ruminicola</i>        | 0.036               | 0.027                | 0.038                | 0.038               | 0.002            | 0.157    |
| <i>Prevotella brevis</i>            | 0.022               | 0.025                | 0.023                | 0.020               | 0.0002           | 0.848    |
| Protozoa                            | 0.024 <sup>b</sup>  | 0.045 <sup>a</sup>   | 0.021 <sup>b</sup>   | 0.027 <sup>b</sup>  | 0.003            | 0.010    |
| Total Fungi                         | 0.0030 <sup>a</sup> | 0.0023 <sup>ab</sup> | 0.0019 <sup>ab</sup> | 0.0014 <sup>b</sup> | 0.0002           | 0.043    |
| <i>Neocallimastigales</i>           | 0.017 <sup>t</sup>  | 0.013                | 0.011                | 0.010 <sup>t</sup>  | 0.0001           | 0.067    |
| <i>Entodinium</i>                   | 0.069               | 0.147                | 0.060                | 0.096               | 0.001            | 0.136    |
| Archaea                             | 0.013 <sup>a</sup>  | 0.016 <sup>a</sup>   | 0.010 <sup>b</sup>   | 0.010 <sup>b</sup>  | 0.0007           | <0.001   |
| Total Methanogen                    | 0.0012 <sup>a</sup> | 0.0012 <sup>a</sup>  | 0.0006 <sup>b</sup>  | 0.0007 <sup>b</sup> | 0.0001           | 0.025    |
| <i>Methanomassiliicoccales</i>      | 0.0013              | 0.0014               | 0.0009               | 0.0011              | 0.0001           | 0.307    |
| <i>Methanobrevibacter</i>           | 0.00016             | 0.00019              | 0.00013              | 0.00011             | 0.00002          | 0.385    |
| <i>Methanosphaera stadtmanae</i>    | 0.0003              | 0.0003               | 0.0003               | 0.0003              | 0.00002          | 0.842    |
| <i>Ruminococcus flavefaciens</i>    | 0.0009 <sup>a</sup> | 0.0006 <sup>ab</sup> | 0.0003 <sup>b</sup>  | 0.0003 <sup>b</sup> | 0.00007          | 0.022    |
| <i>Ruminobacter amylophilus</i>     | 0.011 <sup>b</sup>  | 0.002 <sup>b</sup>   | 0.025 <sup>a</sup>   | 0.011 <sup>b</sup>  | 0.002            | <0.001   |
| <i>Ruminococcus albus</i>           | 0.071               | 0.081 <sup>t</sup>   | 0.066                | 0.048 <sup>t</sup>  | 0.0005           | 0.079    |
| <i>Butyrivibrio fibrisolvens</i>    | 0.089 <sup>a</sup>  | 0.094 <sup>a</sup>   | 0.089 <sup>a</sup>   | 0.068 <sup>b</sup>  | 0.003            | 0.006    |
| <i>Butyrivibrio Proteoclasticus</i> | 0.038 <sup>b</sup>  | 0.031 <sup>b</sup>   | 0.056 <sup>a</sup>   | 0.031 <sup>b</sup>  | 0.003            | 0.001    |
| <i>Fibrobacter succinogenes</i>     | 0.024 <sup>t</sup>  | 0.022 <sup>t</sup>   | 0.012 <sup>t</sup>   | 0.012 <sup>t</sup>  | 0.002            | 0.080    |
| <i>Selenomonas ruminantium</i>      | 0.009 <sup>b</sup>  | 0.005 <sup>b</sup>   | 0.013 <sup>a</sup>   | 0.015 <sup>a</sup>  | 0.001            | 0.001    |
| <i>Streptococcus bovis</i>          | 0.0007              | 0.0004               | 0.0007               | 0.0006              | 0.00006          | 0.131    |
| <i>Eubacterium ruminantium</i>      | 0.006               | 0.006                | 0.006                | 0.004               | 0.0004           | 0.247    |

CON: dietary treatment with 0 g *Camelina sativa* seeds·kg<sup>-1</sup> of concentrate; CS6: dietary treatment with 60 g *Camelina sativa* seeds·kg<sup>-1</sup> of concentrate; CS11: dietary treatment with 110 g *Camelina sativa* seeds·kg<sup>-1</sup> of concentrate; CS16: dietary treatment with 160 g *Camelina sativa* seeds·kg<sup>-1</sup> of concentrate; Different superscript letters (a. b) between dietary treatments differ significantly ( $p < 0.05$ ) and t is referred to values between 0.05 and 0.100 ( $0.05 < t < 0.10$ ); <sup>a</sup>SEM = standard error mean;  $p = p$  value.
